# Supplementary material
Source: publisher figshare collection journal article supplement (https://acs.figshare.com/ndownloader/files/3772258)
Supplement: Supplementary file 1 [file 3772258]

# Facile Transferring of Wafer-Scale Ultrathin Alumina Membranes onto Substrates for Nanostructure Patterning

*Ahmed Al-Haddad,<sup>†,‡</sup> Zhibing Zhan,<sup>†</sup> Chengliang Wang,<sup>†</sup> Samar Tarish,<sup>†,‡</sup> Ranjith Vellacheria,<sup>†</sup> and Yong Lei<sup>\*,†</sup>*

<sup>†</sup> Institute for Physics & IMN MacroNano (ZIK), Ilmenau University of Technology, Professor Schmidt Strasse 26, 98693 Ilmenau, Germany

<sup>‡</sup>Department of Physics, College of Science, University of Al-Mustansiryah, Baghdad, Iraq.

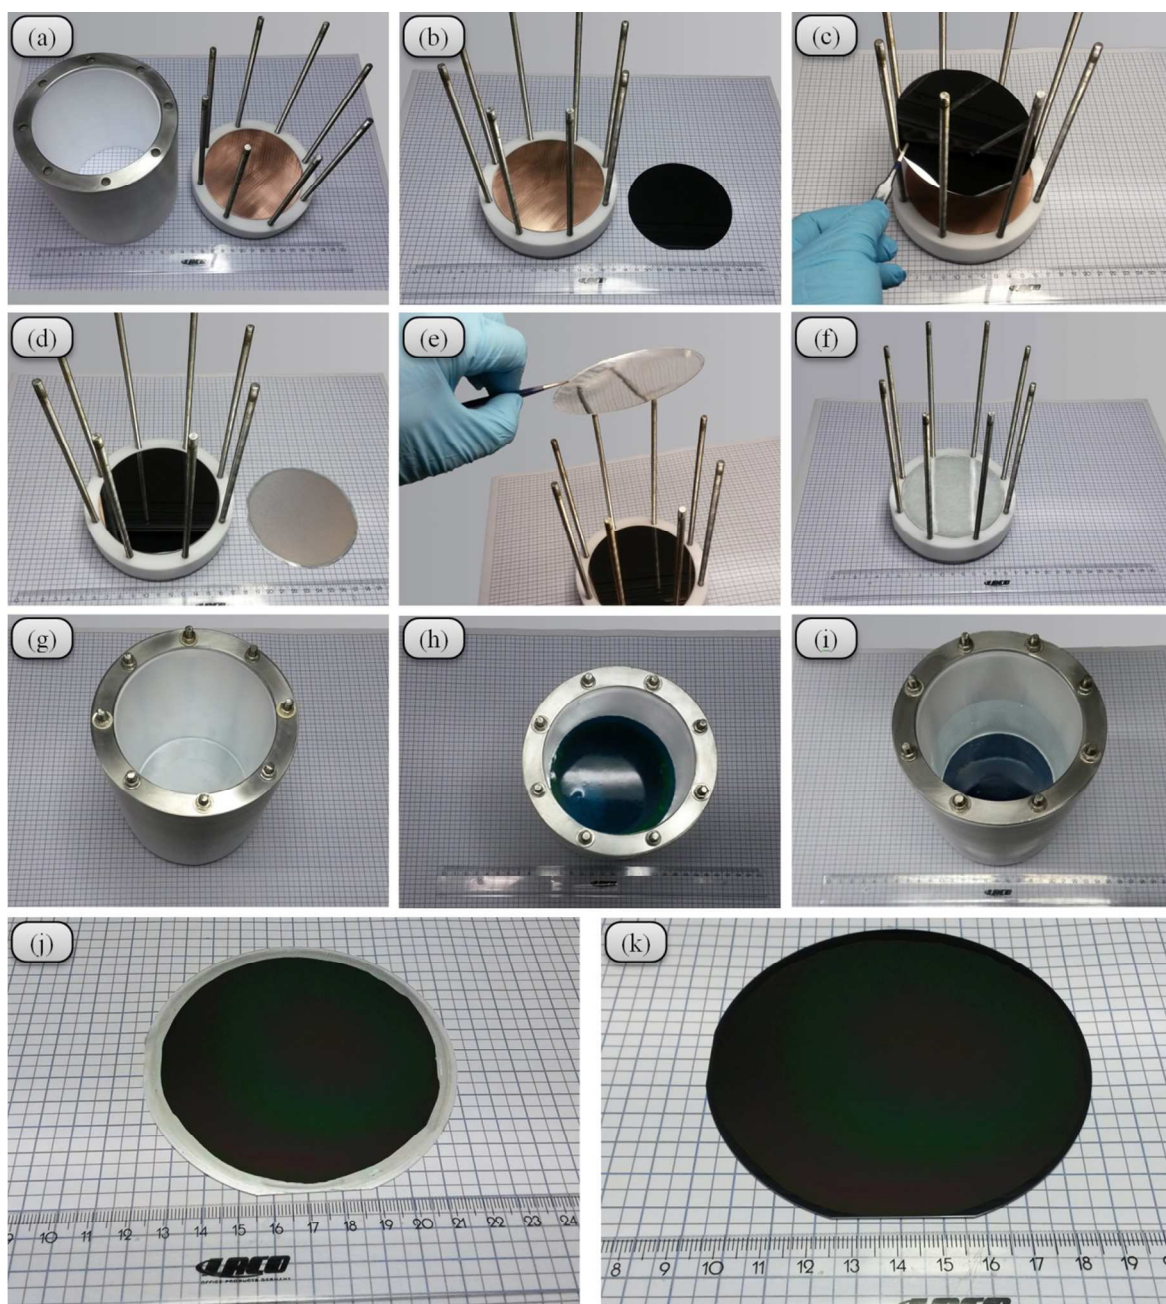

**Figure S1.** Photographs of transferring a 4-inch UTAM onto Si wafer by using the innovative anodization and transferring cell. (a-g) Fixing the Si wafer and the prepared UTAM (with Al backside and barrier layer) inside and assembling the cell. (h) Removing the Al backside in mixture solutions of  $\text{CuCl}_2$  (85 wt %) and  $\text{HCl}$  (15 wt %) for 10 min. (i) Removing the barrier layer by using  $\text{H}_3\text{PO}_4$  solution (5 wt %) at 30 °C. After disassembling the cell, the attached UTAM on Si wafer is obtained (j) before and (k) after removing the residual Al frame.

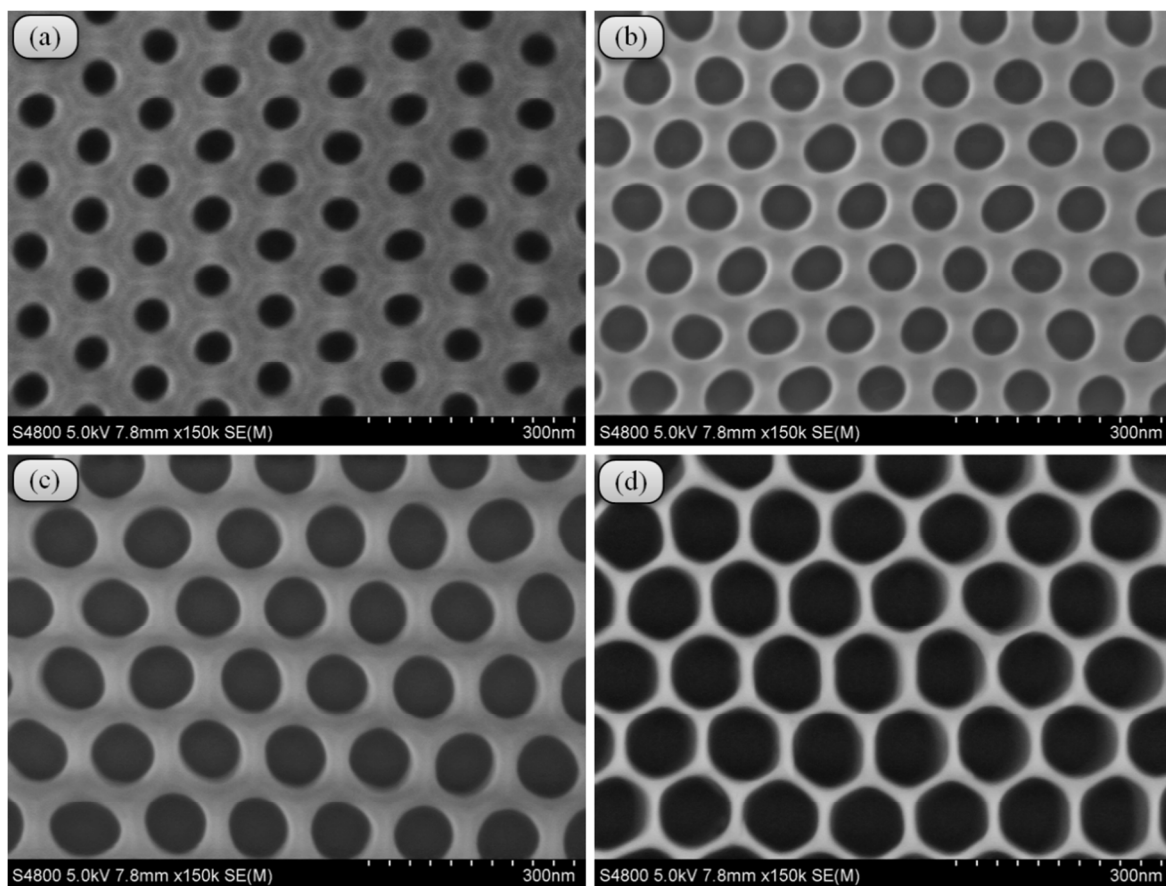

**Figure S2.** SEM images of prepared UTAMs with average nanopore diameters of about (a) 45, (b) 60, (c) 75 and (d) 90 nm.

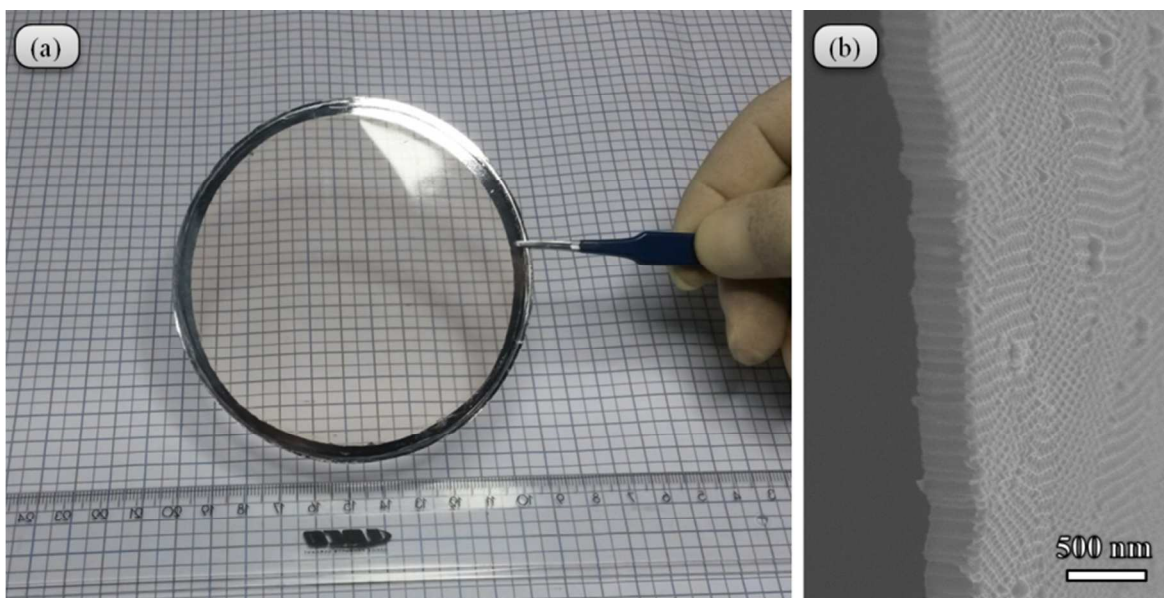

**Figure S3.** (a) Photograph of a free standing 4-inch wafer scale UTAM with the residual Al frame. (b) Large area SEM image of the free standing UTAM with thickness about 500 nm.

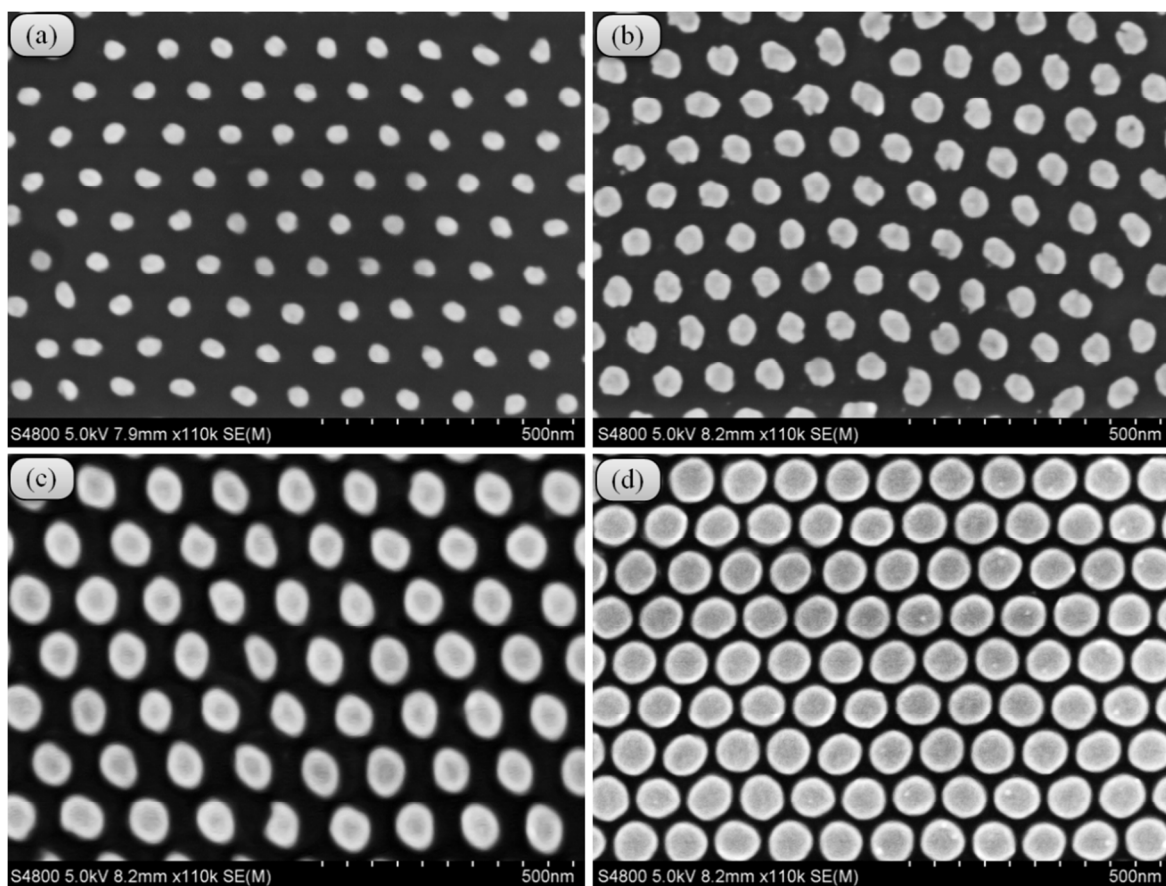

**Figure S4.** SEM images of Au nanoparticle arrays with average diameters of about (a) 45, (b) 60, (c) 75 and (d) 90 nm.
